# Supplementary material for: Quality of the Governing Temperature Variables in WRF in relation to Simulation of Primary Biological Aerosols
Source: Hindawi journal article supplement (doi:10.1155/2015/412658), 2015-01-01

# SUPPLEMENTARY MATERIAL TO

C. A. Skjøth<sup>1</sup>, M. Werner<sup>1</sup>, M. Kryza<sup>2</sup>, B.Adams-Groom<sup>1</sup>, Alison Wakeham<sup>1</sup>, M. Lewis<sup>1</sup> and R. Kennedy<sup>1</sup>

<sup>1</sup>National Pollen and Aerobiology Research Unit, Institute of Science and the Environment, University of Worcester, Henwick Grove, WR2 6AJ, Worcester, UK

<sup>2</sup>Department of Climatology and Atmosphere Protection, University of Wrocław, Poland

## Title:

Quality of the governing temperature variables in WRF-Chem in relation to simulation of primary biological aerosols

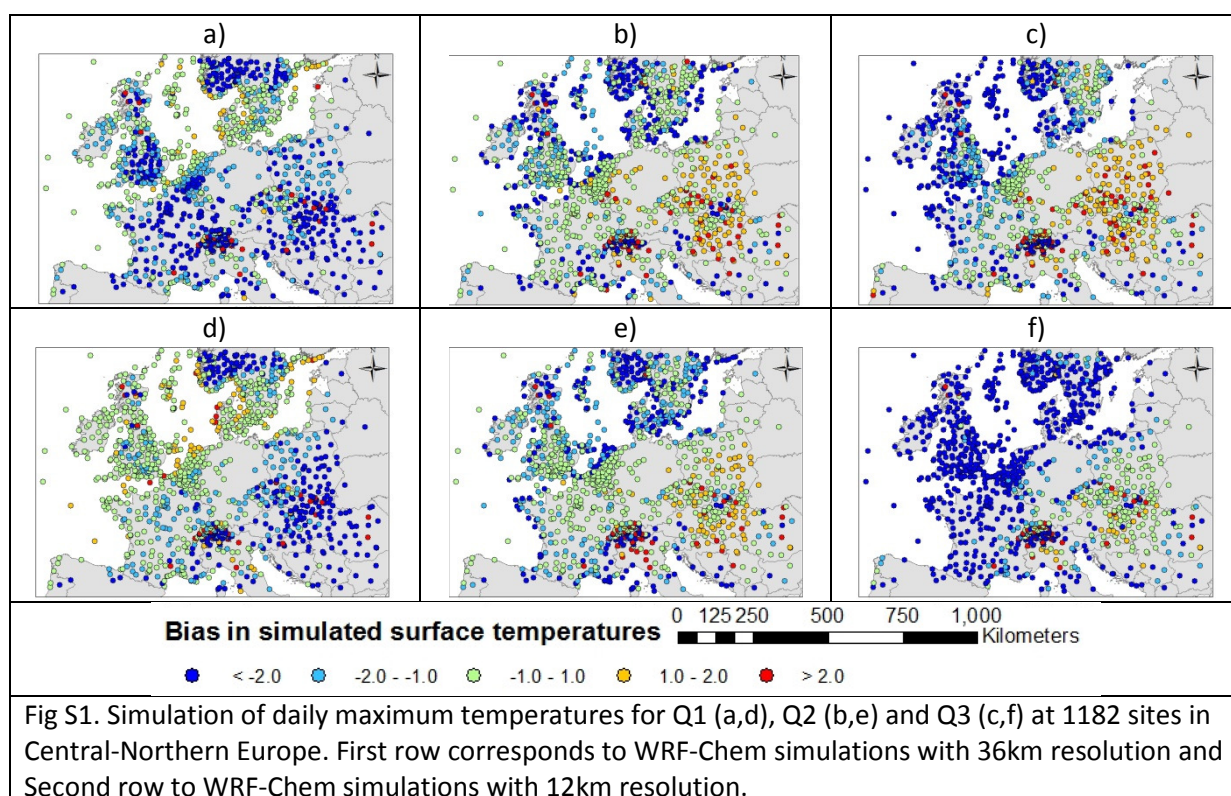

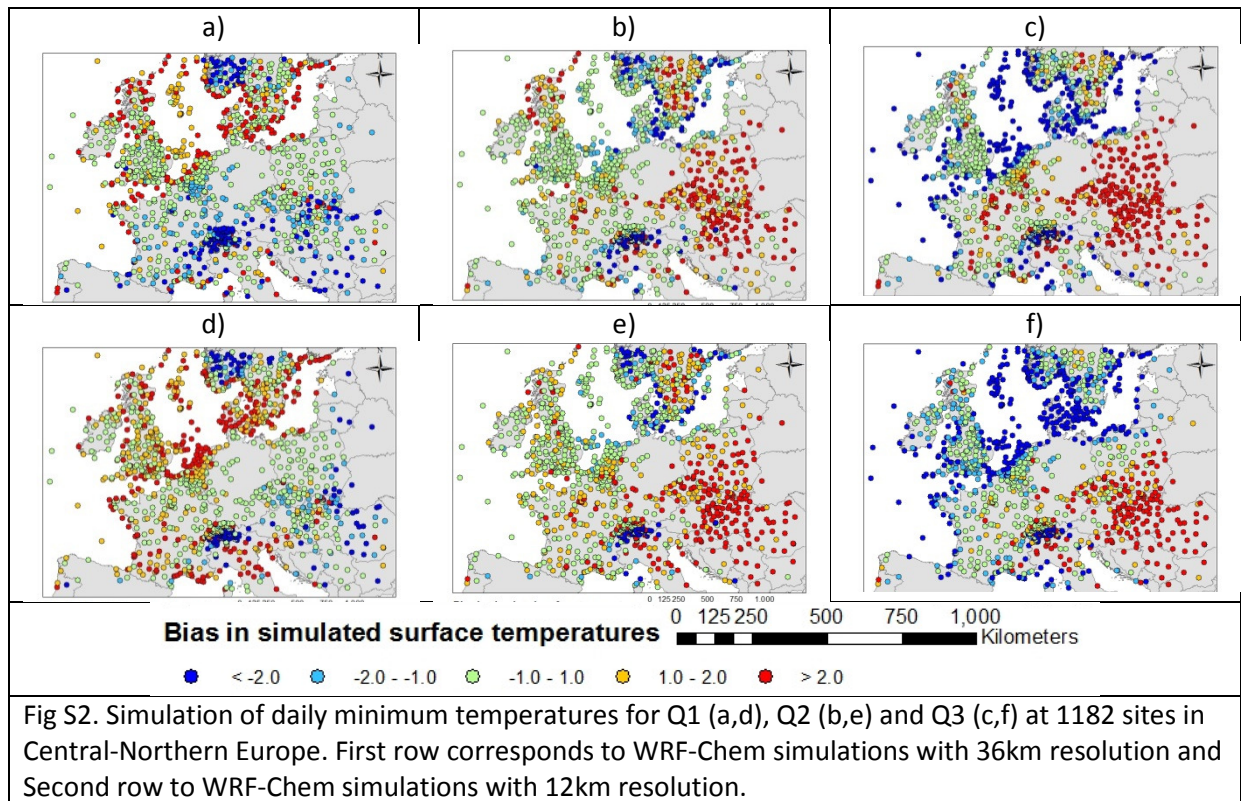

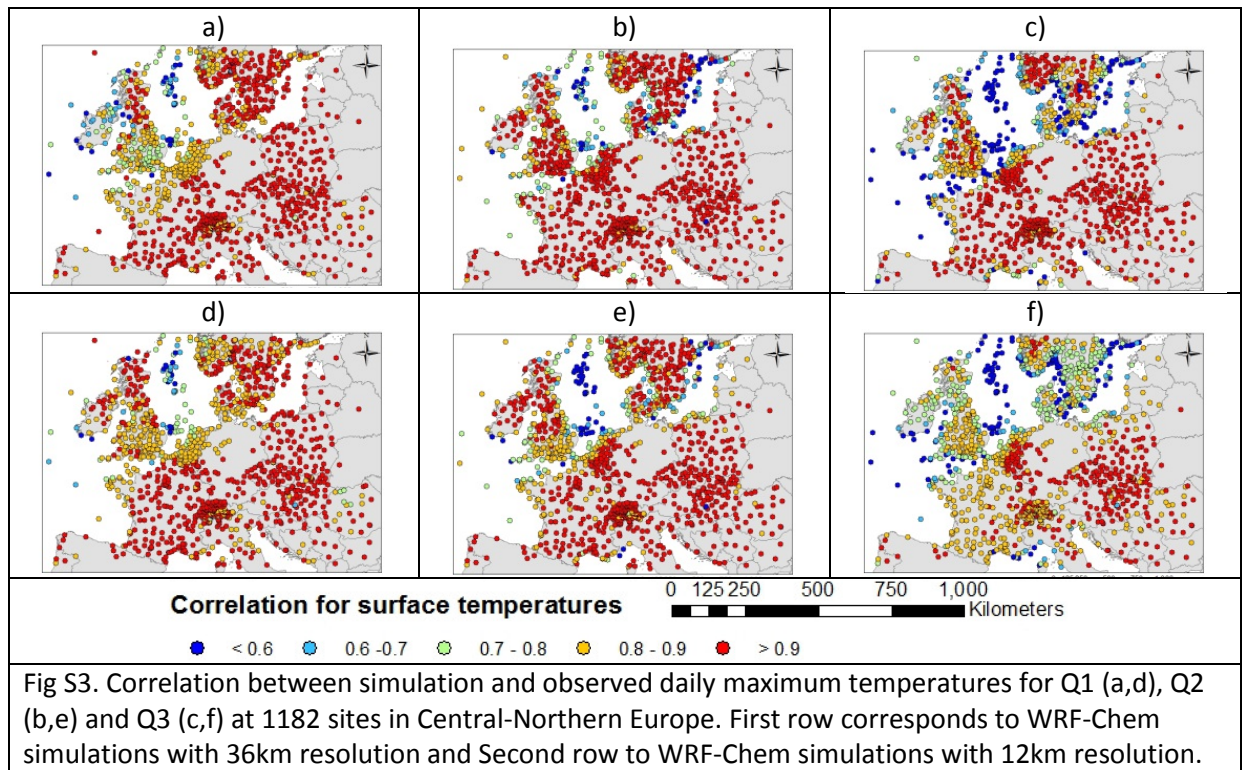

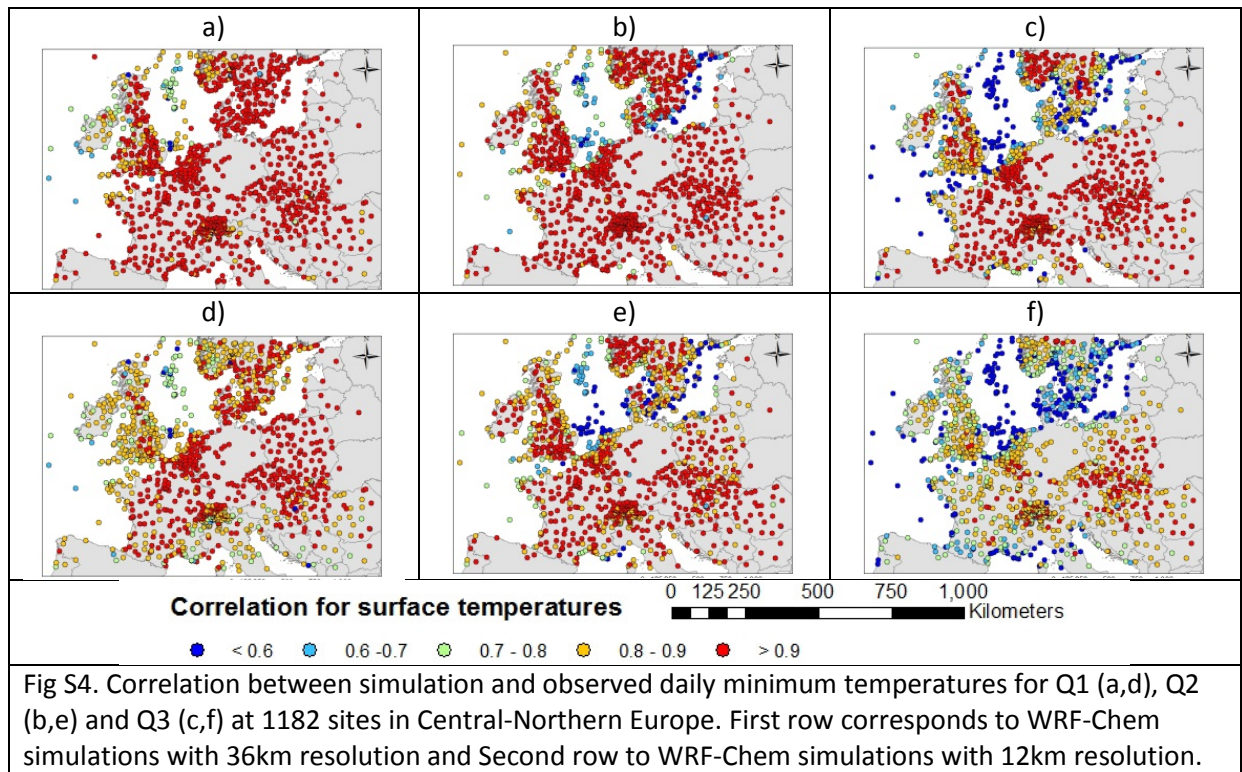

Supplement: f1 [file 412658.f1.pdf]
